# Supplementary material for: Comparison of Doxycycline, Minocycline, Doxycycline plus Albendazole and Albendazole Alone in Their Efficacy against Onchocerciasis in a Randomized, Open-Label, Pilot Trial
Source: PLoS Negl Trop Dis. 2017 Jan 5;11(1):e0005156. doi: 10.1371/journal.pntd.0005156 (PMC5215804; doi:10.1371/journal.pntd.0005156)
Supplement: S2 Table — (DOCX) [file pntd.0005156.s002.docx]

**S2 table: Adverse event assessment, detailed**

|  |  |  | DOX 4w | DOX 3w + ALB 3d | MIN 3w | DOX 3w | ALB 3d | *p*-value |
| --- | --- | --- | --- | --- | --- | --- | --- | --- |
| Stomach/  Abdominal pain | No. of patients |  | 3 | 5 | 2b | 3 | 0 | 0.238-a |
| Days of AE | Mean ± SD | 1 | 1.2 ± 0.45 | 1.5 ± 0.71 | 1.3 ± 0.58 |  |  |
| Min-Max | 1 | 1 - 2 | 1 - 2 | 1 - 2 |
| Median | 1 | 1 | 1.5 | 1 |
| Grade of AEk | 1 | 3 | 6 | 1 | 4 |
| 2 | 0 | 0 | 1 | 0 |
| 3 | 0 | 0 | 1 | 0 |
| Relation to treatmentl | probable | 2 | 4 | 2 | 0 |
| possible | 1 | 2 | 1 | 1 |
| remote | 0 | 0 | 0 | 1 |
|  | not related | 0 | 0 | 0 | 2 |
| Outcomem | resolved spontaneously | 0 | 4 | 3 | 1 |
| resolved with treatment | 3 | 1 | 0 | 3 |
| Nausea | No. of patients | | 2 | 6 | 2c | 1 | 1 | 0.116a |
| Days of AE | Mean ± SD | 1 | 1 | 1.5 ± 0.71 | 1 | 1 |  |
| Min-Max | 1 | 1 | 1 - 2 | 1 | 1 |
| Median | 1 | 1 | 1.5 | 1 | 1 |
| Grade of AEk | 1 | 2 | 4 | 2 | 1 | 1 |
| 2 | 0 | 2 | 1 | 0 | 0 |
| Relation tol treatment | definite | 0 | 2 | 0 | 0 | 0 |
| probable | 1 | 3 | 1 | 0 | 1 |
| possible | 1 | 1 | 1 | 1 | 0 |
| not related | 0 | 0 | 1 | 0 | 0 |
| Outcomem | resolved spontaneously | 0 | 6 | 2 | 1 | 1 |
| resolved with treatment | 2 | 0 | 1 | 0 | 0 |
| Dizziness | No. of patients | | 0 | 0 | 5d | 1 | 0 | **0.001a** |
| Days of AE | Mean ± SD |  |  | 1.2 ± 0.45 | 1 |  |  |
| Min-Max | 1 - 2 | 1 |
| Median | 1 | 1 |
| Grade of AEk | 1 | 6 | 1 |
| Relation to treatmentl | probable | 5 | 1 |
| remote | 1 | 0 |
| Outcomem | resolved spontaneously | 6 | 1 |
| Vomiting | No. of patients | | 3 | 1 | 1 | 1 | 0 | 0.521a |
| Days of AE |  | 1 | 1 | 1 | 1 |  |  |
| Grade of AEk | 1 | 2 | 1 | 0 | 0 |
| 2 | 1 | 0 | 1 | 1 |
| Relation to treatmentl | probable | 1 | 0 | 0 | 1 |
| possible | 2 | 1 | 1 | 0 |
| Outcomem | resolved spontaneously | 1 | 1 | 1 | 1 |
| resolved with treatment | 2 | 0 | 0 | 0 |
| Other | No. of patients | | 1e | 3f | 2g | 2h | 0 | n.d. |
| Days of AE |  | 1 | 1 | 1 | 1 |  |  |
| Grade of AEk | 1 | 0 | 3 | 2 | 2 |
| 2 | 1 | 0 | 0 | 0 |
| Relation to treatmentl | probable | 1 | 0 | 0 | 0 |
| possible | 0 | 1 | 0 | 1 |
| not related | 0 | 2 | 1 | 1 |
| Outcomem | resolved spontaneously | 0 | 0 | 1 | 1 |
| resolved with treatment | 1 | 2 | 1 | 0 |
| resolved with residual effecti | 0 | 1 | 0 | 1 |

n.d. = not done

a Fisher`s exact test

bThe patient with two days abdominal pain had grade 1 on day 2 and grade 3 on day 8 (both resolving spontaneously)

cThe patient with two days nausea had them on day 2 and day 13 (both grade 1)

dThe patient with two days dizziness had them on two following days (day 2 and day 3, both days grade 1)

eDiarrhoea

fHeadache, Itching, pain condition

glethargy (fever), body pain

hGeneral malaise, waist pain

iBoth AEs with residual effect (waist pain, pain condition) were not related to treatment

kThe Grading was always 1-3, to shorten this table only the grades which actually occurred are shown.

lThe Relation to treatment could always be assessed as “definite”, “probable”, “possible”, “remote” and “not related”. To shorten this table only the relations which actually occurred are shown.

mThe Outcome could always be assessed as “resolved spontaneously”, “resolved with treatment”, “resolved with residual effect”, “unchanged” and “death”. To shorten this table only the outcomes which actually occurred are shown.
